# Supplementary material
Source: PubMed Central journal article supplement (PMC6240402)

## Supplemental Materials

### MATERIALS AND METHODS

#### Peptides synthesis and stock preparation

R321 and R323 were synthesized on a Liberty Blue Microwave peptide synthesizer (CEM Corporation) using Fmoc chemistry and low loading Rink Amide MBHA resin (Merck). The following modifications have been introduced to the published protocol of high efficiency peptide synthesis (<http://www.ncbi.nlm.nih.gov/pubmed/24456219>): The coupling with N,N'-Diisopropylcarbodiimide (DIC)/ ethyl 2-cyano-2-(hydroxyimino) acetate (OXYMA) was performed for 4 min at 90°C for all residue except for His, for which the reaction was carried out for 10 min at 50°C. A 5-fold amino acid excess was used on all cycles and all residues were double-coupled. All deprotection cycles were conducted at room temperature to avoid racemization and aspartimide formation. Due to the high cost of Fmoc-NH-(PEG)<sub>27</sub>-COOH (Merck), it was attached manually overnight using 1.2-fold excess and HCTU as an activating agent. The peptides were cleaved from the resin and deprotected with a mixture of 90.0% (v/v) trifluoroacetic acid (TFA) with 2.5% water, 2.5% triisopropyl-silane, 2.5% 2,2'-(ethylenedioxy)diethanethiol and 5% thioanisol. Peptides were purified on a preparative (25 mm × 250 mm) Atlantis C3 reverse phase column (Agilent Technologies) in a 90 min gradient of 0.1% (v/v) trifluoroacetic acid in water and 0.1% trifluoroacetic acid in acetonitrile, with a 10 mL/min flow rate. The fractions containing peptides were analyzed on Agilent 6100 LC/MS spectrometer with the use of a Zorbax 300SB-C3 PoroShell column and a gradient of 5% acetic acid in water and acetonitrile. Fractions that were more than 95% pure were

24 combined and freeze dried. Peptides stock solution was prepared by dissolving in  
25 DMSO or DMSO-d<sub>6</sub> (for NMR experiments). Upon reconstitution in PBS, pH 7.2, the  
26 final concentration of DMSO was less than 1%. The solutions were sonicated, kept at  
27 room temperature overnight, centrifuged and stored at -20°C.

28

### 29 **Dynamic Light Scattering (DLS)**

30 Peptides were resuspended in 100% DMSO to a concentration of 1 mM and then  
31 further diluted in PBS to a final concentration of 10 µM. The hydrodynamic radius of the  
32 peptides was measured on a DynaPro-801 (Protein Solutions, Charlottesville, VA)  
33 molecular size detector and the data was analyzed with the provided software using an  
34 aqueous buffer model.

35

### 36 **Chemotaxis Assays**

37 Optimal concentrations of chemokines (12 nM CCL11, 25 nM CCL24, 100 nM CCL26,  
38 and 1 µM platelet-activating factor, PAF) were used to induce cell chemotaxis<sup>1,2</sup>  
39 CCL11, CCL24, and CCL26 were purchased from BioLegend (San Diego, CA) and PAF  
40 (C16) was purchased from Tocris Bioscience (Minneapolis, MN). Inhibitors or controls  
41 were placed in both upper and lower chambers of transwell plates with 5 µm pore size  
42 membranes (Corning, Kennebunk, ME). For assays used to determine the effect of  
43 R321 on the chemotaxis of human peripheral blood eosinophils toward PAF, a PAF  
44 receptor inhibitor WEB 2086 was purchased from Tocris Bioscience (Minneapolis, MN)  
45 and used at a concentration of 100 µM as a positive control. A total of 1x10<sup>5</sup> cells were

46 placed in each well and following 4h of migration cells were counted using flow  
47 cytometry (Beckman Quanta SC, Beckman Coulter, Indianapolis, IN).

48

#### 49 **CCL11-induced secretion of ECP**

50 Purified human peripheral blood eosinophils were resuspended in PBS + 0.1% BSA to a  
51 final concentration of  $1 \times 10^6$  cells/mL and 100  $\mu$ L were aliquoted per well. Cells were  
52 pretreated for 30 min with 1  $\mu$ M R321, R323, or vehicle, and stimulated with 12 nM  
53 CCL11 for 3h. Following stimulation, cells were centrifuged (1500 rpm, 10 min) and  
54 supernatants were collected for further analysis. ECP detection in supernatants was  
55 performed using a commercial ELISA kit (MesaCup ECP test, MBL, Woburn, MA).

56

#### 57 **Detection of ERK 1/2 and AKT**

58 AML14.3D10-CCR3 cells were serum starved for 4h, resuspended in RPMI 1640 +  
59 0.1% BSA to a density of  $1 \times 10^7$  cells/mL, and then pretreated with either vehicle control  
60 (PBS + 1% DMSO) or 10  $\mu$ M inhibitors (R321, R323, SB238437, or UCB35625) for 30  
61 min at 37°C and 5% CO<sub>2</sub>. Cell aliquots were taken before stimulation and 2.5, 5, 10, 15,  
62 and 30 min after stimulation with 100 nM CCL11 and washed in ice cold PBS. Cell  
63 pellets were lysed in RIPA lysis buffer (Santa Cruz Biotechnology, Santa Cruz, CA)  
64 containing 1mM PMSF, 1mM Na-orthovanadate, 30 mM NaF, and protease inhibitor  
65 cocktail tablet (Roche, Indianapolis, IN). Cell lysate proteins were separated on 12%  
66 (w/v) SDS-PAGE gels (15 $\mu$ g/ lane) and transferred to PVDF membranes at 20V for 40  
67 min. Membranes were blocked with 5% BSA for 2h at RT, and incubated overnight at  
68 +4°C with rabbit anti-phospho-ERK 1/2 antibodies or rabbit anti-phospho-AKT

69 antibodies (Cell Signaling Technology, Danvers, MA). The next day, membranes were  
70 extensively washed and incubated for 1h at RT with secondary goat anti-rabbit IgG-  
71 HRP antibodies (Santa Cruz Biotechnology, Dallas, TX). Western blots were visualized  
72 using SuperSignal West Dura Extended Duration Substrate (Thermo Fisher Scientific,  
73 Waltham, MA). For loading controls, membranes were stripped for 15 min in mild  
74 stripping buffer (1.5% glycine, 0.1% SDS, 1% Tween-20, pH 2.2) and reprobed with  
75 rabbit anti-ERK 1/2 antibodies or rabbit anti-AKT antibodies (Cell Signaling Technology,  
76 Danvers, MA). Three independent experiments were performed.

77

#### 78 **Gai activation**

79 GTP-bound Gai was detected using a commercial Gai assay kit (Abcam, Cambridge,  
80 MA) with modifications. Briefly, AML14.3D10-CCR3 cells were serum-starved for 16h  
81 before being pretreated with 200 ng/ml pertussis toxin for 2h, 10  $\mu$ M R321 for 30 min, or  
82 with vehicle control. Pretreated cells were then stimulated with 8 nM CCL11 or medium  
83 for 1 min. The reaction was stopped by adding and washing once in ice cold PBS. Ten  
84 (10) million cells were used for each condition. Washed cells were lysed with 1x lysis  
85 buffer following manufacturer instructions. For pull-down of active Gai, mouse anti-GTP  
86 bound Gai antibody was conjugated to Dynabeads Protein G (Life Technologies,  
87 Carlsbad, CA) for 15 min at RT. Conjugated beads were washed 3 times with TBST and  
88 incubated with cell lysates for 20min at RT. After washing with TBST, bound proteins  
89 were eluted by boiling the beads in 2x SDS sample buffer for 5 min. Eluates were  
90 resolved by SDS-PAGE and immunoblotted using a polyclonal rabbit anti-total Gai  
91 antibody (Cell Signaling Technology, Danvers, MA).

92 **CCR3 degradation**

93 AML14.3D10-CCR3 cells were resuspended in RPMI1640 + 0.1% BSA. Aliquots of  
94  $1 \times 10^6$  cells were pretreated with 10  $\mu$ M cycloheximide for 1h at 37°C. Some cells were  
95 concurrently pretreated with 10  $\mu$ M R321 for 30 min. Pretreated cells were stimulated  
96 with 8 nM CCL11/eotaxin-1 or CCL5/RANTES for 3h to induce receptor degradation.  
97 Cells were lysed in RIPA buffer and immunoblotted for CCR3 using a polyclonal rabbit  
98 anti-CCR3 antibody (Abcam, Cambridge, MA) followed by goat anti-rabbit IgG-HRP  
99 secondary antibody (Santa Cruz Biotechnology, Santa Cruz, CA).

100

101 **Immunofluorescence and Confocal Microscopy**

102 AML14.3D10-CCR3 cells were serum starved for 4h and then resuspended in RPMI  
103 1640 + 0.1% BSA to a density of  $1 \times 10^6$  cells/mL. Cells were pretreated with 10  $\mu$ M  
104 inhibitors (R321, SB238437 or UCB35625) or R323 or vehicle controls for 30 min at  
105 37°C and then stimulated with 100 nM CCL11. Aliquot s were taken before stimulation  
106 and 30 min after chemokine addition. Cytospin preparations were made by  
107 centrifugation of the treated cells at 300 rpm (10.16x g) for 5 min onto glass slides in a  
108 cytocentrifuge (Cytospin 2, Shandon, Pittsburgh, PA). Cells were fixed in ice cold  
109 methanol for 15 min at -20°C and washed 3 times in 0.1% Triton X-100 in PBS before  
110 blocking in 10% normal goat serum in PBS for 2h at RT. The slides were incubated  
111 overnight at +4°C with primary antibodies diluted i n 0.1% normal goat serum in PBS.  
112 CCR3 was detected with 5  $\mu$ g/mL mouse anti-human CCR3 antibody (Biolegend, San  
113 Diego, CA) and  $\beta$ -arrestin 2 with rabbit monoclonal anti-human  $\beta$ -arrestin 2 antibody  
114 (Cell Signalling Technology, Danvers, MA). After extensive washing in 0.1% Tween-

115 20, samples were incubated with appropriate AlexaFluor<sup>®</sup>488- or AlexaFluor<sup>®</sup>568-  
116 conjugated anti-mouse and anti-rabbit secondary antibodies (Cell Signaling  
117 Technology, Danvers, MA) used at 1:500 dilution for 1h at RT. After washing,  
118 coverslips were mounted on the glass slides with SlowFade Gold antifade reagent  
119 with DAPI (Invitrogen, Carlsbad, CA). Images were collected with a Zeiss LSM 700  
120 laser scanning confocal microscope and 100x/1.45 oil immersion objective using Zen  
121 software (Carl Zeiss AG, Oberkochen, Germany) and further processed with Photoshop  
122 CS5 (Adobe, San Jose, CA). Quantitative colocalization analysis was performed by  
123 selecting single cells as regions of interest (n=50 per treatment group) and calculating  
124 mean colocalization coefficients by Pearson's correlation method. Data is presented as  
125 mean  $\pm$  SEM. Statistical analysis was performed using GraphPad Prism software  
126 (GraphPad, San Diego, CA) by two-way analysis of variance (ANOVA), followed by  
127 Tukey *post hoc* analysis.

128

### 129 **Cell surface staining and gating strategy for mouse blood eosinophils**

130 Mouse blood (900  $\mu$ L) was collected by cardiac puncture into EDTA-coated tubes and  
131 red blood cell lysis was performed via hypotonic shock with H<sub>2</sub>O. White blood cells were  
132 washed with PBS and resuspended to  $1 \times 10^6$  cells/100  $\mu$ L of flow cytometry buffer (PBS  
133 + 0.1% BSA). Inhibition of non-specific binding to Fc receptors was performed using a  
134 rat anti-mouse CD16/CD32 antibody for 5 min at room temperature (BD Biosciences,  
135 San Jose, CA). Cells were subsequently stained for 30 min at RT in the dark with the  
136 following antibodies: rat anti-mouse CCR3 fluorescein-conjugated antibody (R&D  
137 Systems, Minneapolis, MN), PE-conjugated rat anti-mouse Siglec-F antibody (BD

138 Biosciences, San Jose, CA), and rat anti-mouse PerCP-Cyanine 5.5 Ly-6G (Gr1)  
139 antibody (Thermo Fisher Scientific, Waltham, MA). Cells were washed 3x in PBS,  
140 resuspended in 2% paraformaldehyde and analyzed immediately on a Quanta SC flow  
141 cytometer (Beckman Coulter, Indianapolis, IN). Eosinophils were gated from live cells  
142 as SSC<sup>hi</sup>, Siglec F–CCR3 double positive, Gr1<sup>Lo-neg</sup>. Results were analyzed using  
143 FlowJo software (FlowJo LLC, Ashland, OR).

144

#### 145 **Bronchoalveolar lavage (BAL)**

146 One day after the last DRA allergen or sham PBS challenge, mice were euthanized and  
147 BAL cells were collected by lavage with 2 mL of cold PBS injected into the trachea via a  
148 catheter. Total cell counts were performed using a Countess automated cell counter  
149 (Thermo Fisher Scientific, Waltham, MA). For differential BAL cell counts, cytopsin  
150 preparations were stained with Wright-Giemsa stain (Sigma- Aldrich, St. Louis, MO).  
151 Cells were classified as macrophages, lymphocytes, neutrophils, and eosinophils by  
152 standard morphology and staining. A minimum of 200 cells were counted per slide.

153

#### 154 **Determination of airway responsiveness to methacholine**

155 Twenty-four hours after the last intranasal challenge, mice were anesthetized and  
156 attached to the FlexiVent rodent ventilator/pulmonary mechanics analyzer (Scireq,  
157 Montreal, Canada). Baseline respiratory parameters were measured as previously  
158 described.<sup>3</sup> Airway reactivity was assessed by measuring response to increasing doses  
159 (0, 5, 10, 20, and 40 µg) of methacholine (Sigma, St Louis, MO) administered  
160 intravenously via the jugular vein.

161 **Reductive Methylation of Membrane Preparations.**

162 ChemiSCREEN Chem-1 membrane preparations for recombinant human CCR3  
163 (HTS008M) and negative control (HTS000MC1) CCR3-null membranes were  
164 purchased from EMD Millipore. Membrane preparation storage buffer contained 50 mM  
165 Tris pH 7.4, 10% glycerol and 1% BSA. Glycerol and BSA are important components for  
166 the stability and integrity of the membranes, however BSA and Tris interfere with the  
167 reductive methylation reaction. Therefore, <sup>13</sup>C formaldehyde (catalog # 489417, Aldrich)  
168 and borane–ammonia complex (Catalog #682098, Aldrich) were used in excess to  
169 ensure labeling of all possible components of the membranes. Upon quenching the  
170 reaction with excess Tris-HCl buffer, membrane fractions were separated by  
171 ultracentrifugation at 4°C and the membrane pellets were resuspended in PBS  
172 containing 10% glycerol and 1% unlabeled BSA <sup>4</sup>. The latter step was repeated to  
173 remove residual labeled components. Reductive methylation of the membrane  
174 preparations was performed as described previously <sup>5,6</sup>. In brief, 20 µl of 1 M borane–  
175 ammonia complex (Catalog #682098, Aldrich) and 40 µl of 1 M <sup>13</sup>C formaldehyde  
176 (Catalog #489417, Aldrich) were added to 1 ml of membrane preparation. This mixture  
177 was incubated with stirring for 2 h at 4°C. The addition of borane–ammonia and  
178 formaldehyde was repeated, and the mixture was incubated with stirring for 2 more  
179 hours. The final 10 µl 1 M borane – ammonia complex was then added and the mixture  
180 was incubated at 4°C overnight with stirring. The reaction was then stopped by adding  
181 110 µl of 2 M Tris-HCl (pH 7.6). Thereafter, the membrane preparations were separated  
182 by ultracentrifugation at 4°C and resuspended in PBS containing 10% glycerol and 1%  
183 unlabeled BSA to be used for NMR experiments.



184 **Heteronuclear Single Quantum Coherence (HSQC) NMR**

185 Final samples (200  $\mu$ l) contained 50% membrane preparation, 10% D<sub>2</sub>O (Catalog  
186 #151882, Aldrich), 2% DMSO-d<sub>6</sub> (Catalog #156914, Aldrich). CCL11 (eotaxin) was  
187 added at a final concentration of 1  $\mu$ M. The R321 peptide was added at final  
188 concentrations of 0.05, 0.4, 2.0, and 10.0  $\mu$ M. Peptide stocks were prepared in DMSO-  
189 d<sub>6</sub> and then diluted in PBS, left overnight and centrifuged before addition to the  
190 membrane preparation. Samples were loaded into 3 mm NMR tubes (part # S-3-600-7,  
191 Norell). <sup>1</sup>H-<sup>13</sup>C HSQC NMR experiments were carried out on a 900-MHz Bruker Avance  
192 Spectrometer equipped with a cryogenic probe. Spectral widths in  $\omega$ 1 and  $\omega$ 2 were  
193 8389.262 Hz and 3519.359 Hz, respectively, the transmitter offsets were positioned at  
194 4.7 p.p.m for the <sup>1</sup>H dimension and 40 p.p.m. in the <sup>13</sup>C dimension. <sup>13</sup>C decoupling was  
195 performed with a GARP sequence. 256 complex points with 168 scans per FID were  
196 recorded, to ensure a 20.9-Hz resolution per point at 900 MHz before zero filling. The  
197 relaxation delay was set to 1.5 s and 32 steady-state scans preceded data acquisition.  
198 Total collection time was 20 hours. Data were processed and analyzed using the  
199 NMRPipe/NMRDraw software <sup>7</sup>. For dissociation constant ( $K_d$ ) determination, the data  
200 were analyzed using Graph Pad Prism 5 non-linear regression saturation single binding  
201 site equation. Mean values and standard deviations were calculated based on different  
202 fitting approaches (regular fit, robust fit, and automatic outlier).

203

204

205 **REFERENCES**

- 206 1. Provost V, Larose M-C, Langlois A, Rola-Pleszczynski M, Flamand N, Laviolette M.  
207 CCL26/eotaxin-3 is more effective to induce the migration of eosinophils of asthmatics than  
208 CCL11/eotaxin-1 and CCL24/eotaxin-2. *Journal of Leukocyte Biology* 2013; 94:213-22.
- 209 2. Miyagawa H, Nabe M, Hopp RJ, Okada C, Bewtra AK, G. T. The effect of WEB 2086 on PAF-  
210 induced eosinophil chemotaxis and LTC<sub>4</sub> production from eosinophils. *Agents and actions*  
211 1992; 37:39-43.
- 212 3. Pinto LH, Eaton E, Chen B, Fleisher J, Shuste D, McCauley R, et al. Gene-environment  
213 interactions in a mutant mouse kindred with native airway constrictor  
214 hyperresponsiveness. *Mammalian Genome* 2008; 19:02-14.
- 215 4. Holden P, Horton WA. Crude subcellular fractionation of cultured mammalian cell lines.  
216 *BMC Res Notes* 2009; 2:243.
- 217 5. Abraham SJ, Kobayashi T, Solaro RJ, Gaponenko V. Differences in lysine pKa values may be  
218 used to improve NMR signal dispersion in reductively methylated proteins. *J Biomol NMR*  
219 2009; 43:239-46.
- 220 6. Tripathi A, Vana PG, Chavan TS, Brueggemann LI, Byron KL, Tarasova NI, et al.  
221 Heteromerization of chemokine (C-X-C motif) receptor 4 with alpha1A/B-adrenergic  
222 receptors controls alpha1-adrenergic receptor function. *Proc Natl Acad Sci U S A* 2015;  
223 112:E1659-68.
- 224 7. Delaglio F, Grzesiek S, Vuister GW, Zhu G, Pfeifer J, Bax A. NMRPipe: a multidimensional  
225 spectral processing system based on UNIX pipes. *J Biomol NMR* 1995; 6:277-93.

226

227 **FIGURE LEGENDS**

228 **Figure S1. R321 does not inhibit platelet-activating factor (PAF)-mediated**  
229 **chemotaxis of human blood eosinophils.** Cells treated with 1 $\mu$ M R321, R323,  
230 UCB35625, or SB328437 did not exhibit statistically significant reduction of chemotaxis  
231 to 1 $\mu$ M PAF. In contrast, the specific PAF receptor inhibitor WEB 2086 achieved 83.18  $\pm$   
232 2.56% inhibition of PAF-mediated chemotaxis in blood eosinophils. Results are shown  
233 as percentage of vehicle chemotaxis and represent mean  $\pm$  SEM from an experiment  
234 performed in triplicate. Compared to vehicle: \*\*\*\*  $p < 0.0001$ .

235

236 **Figure S2. R321 does not induce or promote degranulation with secretion of ECP**  
237 **in human blood eosinophils.** CCL11 (12 nM) induces degranulation with secretion of  
238 ECP. R321 (1 $\mu$ M) alone does not induce a statistically significant increase in ECP  
239 secretion. Cells concurrently treated with CCL11 (12 nM) and 1 $\mu$ M R321, or R323, did  
240 not exhibit statistically significant increases in ECP secretion as compared to CCL11-  
241 vehicle treated cells. <sup>ns</sup> not significant, \* $p < 0.05$ .

242

243 **Figure S3. Representative confocal microscopy images of control cells.** The first  
244 two panels from the top show AML14.3D10-CCR3 cells stained without primary  
245 antibodies or with isotype control of primary antibodies. The bottom panel is included as  
246 a positive control and represents AML14.3D10-CCR3 cells stained for CCR3 and  $\beta$ -  
247 arrestin 2 after 30 min of stimulation with 100nM CCL11.

248

249 **Figure S4. R321 promotes CCR3 internalization in AML14.3D10-CCR3 cells over a**  
250 **prolonged incubation period.** Cells were cultured with vehicle, inhibitors (1 $\mu$ M), and/  
251 or 12 nM CCL11 for a period of 72h. At 24h intervals cells were assessed for surface  
252 expression of CCR3 by staining with PE-conjugated anti-CCR3 antibody and measuring  
253 median fluorescence via flow cytometry. Results are shown as surface expression of  
254 CCR3 as percentage of vehicle expression and represent mean  $\pm$  SEM from an  
255 experiment performed in triplicate. Compared to vehicle: <sup>ns</sup> not significant, \* $p < 0.05$ ,  
256 \*\*\*\* $p < 0.0001$ .

257  
258 **Figure S5. Triple allergen (DRA) acute asthma model protocol in Balb/c mice.**  
259 Allergen sensitization/challenge protocol is indicated. Mice were challenged in their  
260 airways with DRA allergen or PBS control on days 12-14 via intranasal insufflation  
261 (black arrows). Treatment with CCR3 R321 peptide nanoparticles, scrambled R323  
262 control peptide or vehicle was given: **(A) Prophylactically** starting on day 11 before the  
263 i.n. allergen challenges on days 11–14 (**blue arrows**) or **(B) Therapeutically** starting on  
264 day 14, after the last i.n. allergen challenge (**red arrows**).

265  
266 **Figure S6. R321 and R323 treatment does not lead to significant changes in total**  
267 **numbers of macrophages, neutrophils, or lymphocytes in lung airways.** Total  
268 macrophage, neutrophil, and lymphocyte cell numbers in the BAL fluid of triple-allergen  
269 (DRA) challenged mice remain unchanged at even the highest doses of R321 and  
270 R323. R323 was administered at 12 mg/kg. The mean  $\pm$  SEM are shown for 6-7  
271 mice/treatment group from 3 independent experiments.

272 **Figure S7. R321 binds CCR3+ membrane preparations in the absence of CCL11.**

273 (A) Overall strategy to label CCR3 membrane preparations using  $^{13}\text{C}$  labeled  
274 formaldehyde and borane-ammonia complex. (B)  $^{13}\text{C}$  HSQC spectra of  $^{13}\text{C}$ -reductively  
275 methylated CCR3 membrane preparations with signal designations indicated. (C)  
276 Determination of the dissociation rate constant ( $K_d$ ) for R321 (0.05-10  $\mu\text{M}$ ) binding to  
277 CCR3 membrane preparations in the absence of CCL11 shows that R321 affects the  
278 intensities of signal 1 and signal 2 with  $K_d$  values of  $1.604 \pm 0.010 \mu\text{M}$  and  $0.014 \pm$   
279  $0.001 \mu\text{M}$ , respectively, while having no effect on signals 3 and 4 that are present on  
280 CCR3 null membranes.

281 **Figure S8. Evaluation of CCL11 binding to CCR3 null membrane preparations.**  $^{13}\text{C}$

282 HSQC spectra of  $^{13}\text{C}$ -reductively methylated CCR3 null membranes were recorded with  
283 1  $\mu\text{M}$  CCL11. Spectral comparisons between reductively methylated CCR3 null  
284 membranes (CCR3-K-di  $^{13}\text{CH}_3$ ) (red) and CCR3 null membranes + CCL11 (blue) do not  
285 show any signal changes indicative of significant binding. Western blot analysis of  
286 membrane preparations from Chem-1 cells overexpressing CCR3 and CCR3 null cells  
287 shows the absence of CCR3 expression in the null membranes.

288 **Figure S9. R321 induces concentration-dependent spectral changes in CCR3**

289 **membrane preparations.**  $^{13}\text{C}$  HSQC spectra of  $^{13}\text{C}$ -reductively methylated CCR3  
290 membrane preparations were recorded with R321 at 0.05, 0.4, 2.0, 10.0  $\mu\text{M}$ . Spectral  
291 comparisons are shown for CCR3 alone (CCR3-K-di  $^{13}\text{CH}_3$ ) (**red**) and CCR3 + R321  
292 (**blue**) at (A) 0.05  $\mu\text{M}$ , (B) 0.4  $\mu\text{M}$ , (C) 2.0  $\mu\text{M}$ , (D) 10.0  $\mu\text{M}$ , show chemical shift

293 changes indicative of binding. Black arrows show significant changes in signal line  
294 widths and chemical shifts.

295 **Figure S10. Schematic of the CCR3 signaling pathway and proposed R321**  
296 **mechanism of inhibition. (A)** Agonist receptor binding leads to activation of the G-  
297 protein dependent signaling cascade resulting in eosinophil chemotaxis, secretion and  
298 degranulation. Upon prolonged exposure to agonist, CCR3 is desensitized and  
299 internalized via a  $\beta$ -arrestin mediated endocytic pathway. **(B)** R321 nanoparticles  
300 dissipate upon contact with the cell membrane, allowing the R321 peptide monomer to  
301 displace the CCR3 TM2 helix. R321 binding alters the CCR3 structure in a manner that  
302 inhibits G-protein dependent signaling but not  $\beta$ -arrestin-mediated internalization  
303 (endocytosis) and degradation of CCR3.

Figure S1

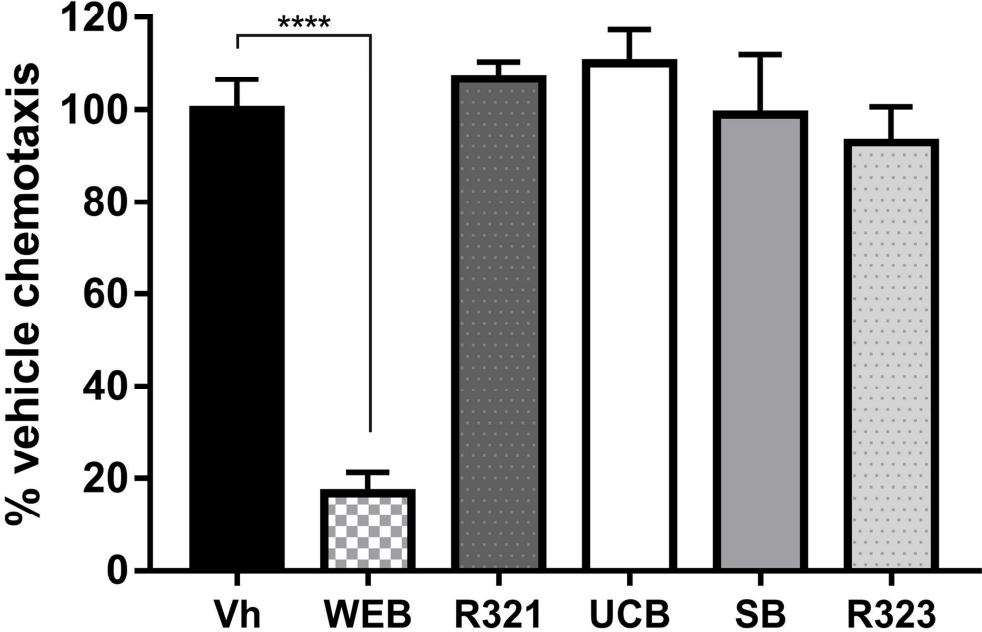

Figure S2.

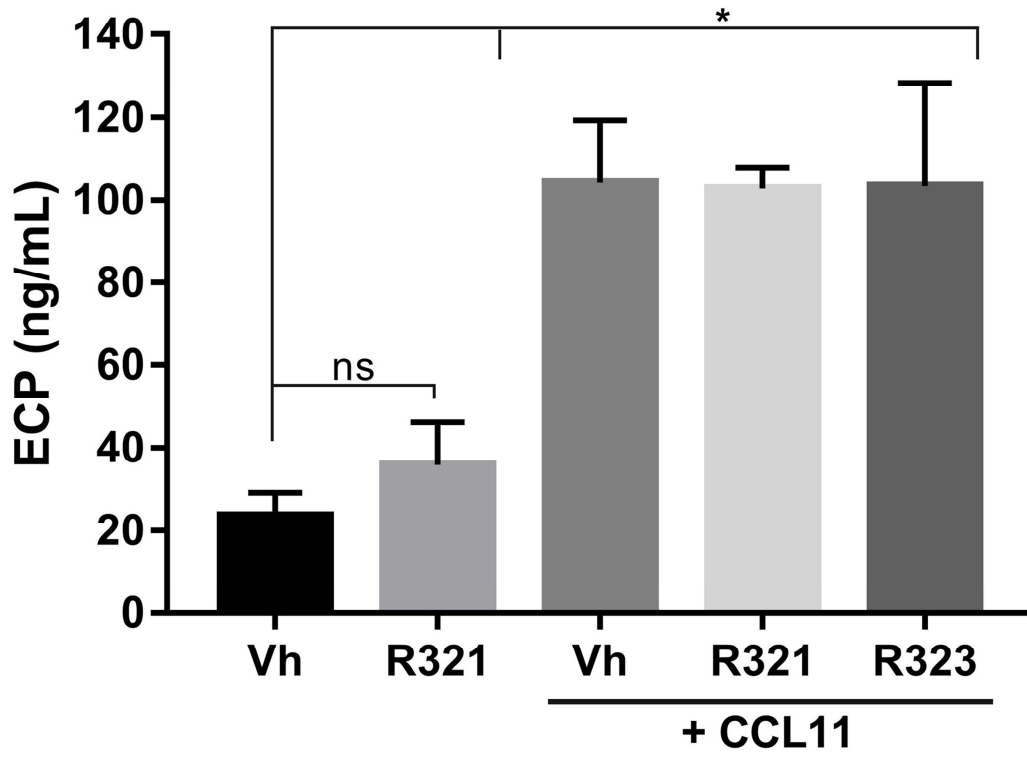



**Figure S3**

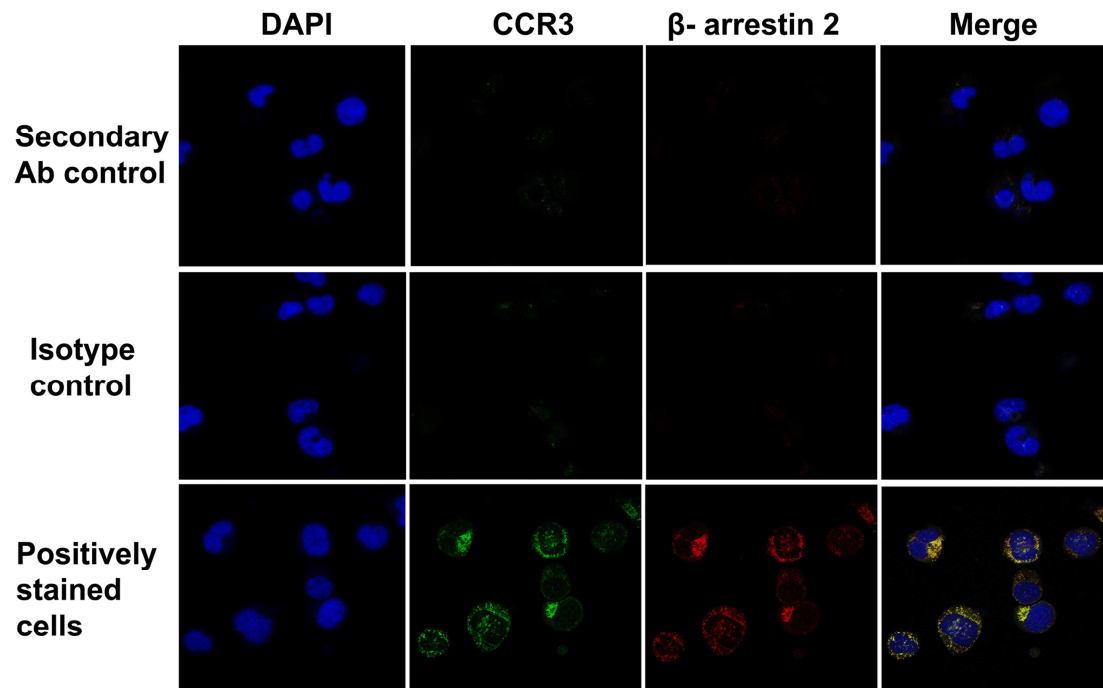

Figure S4

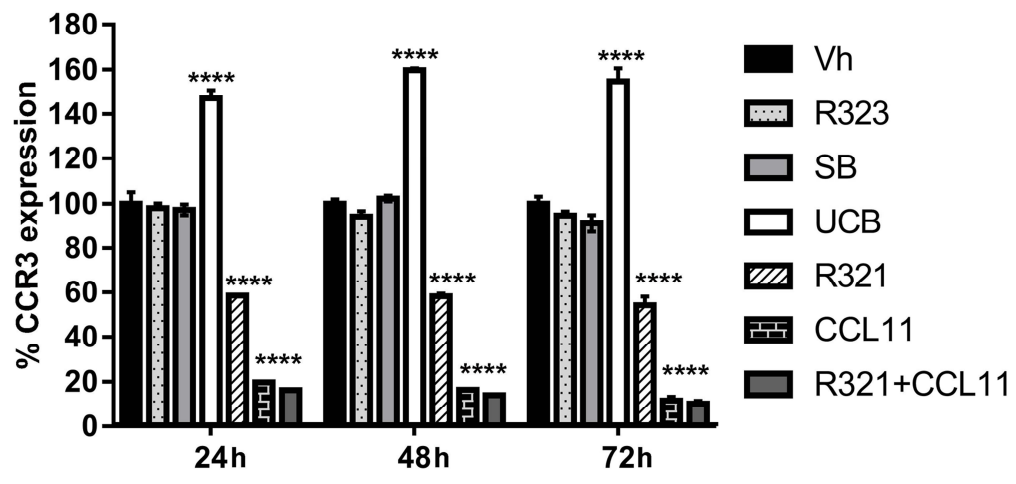



Figure S6

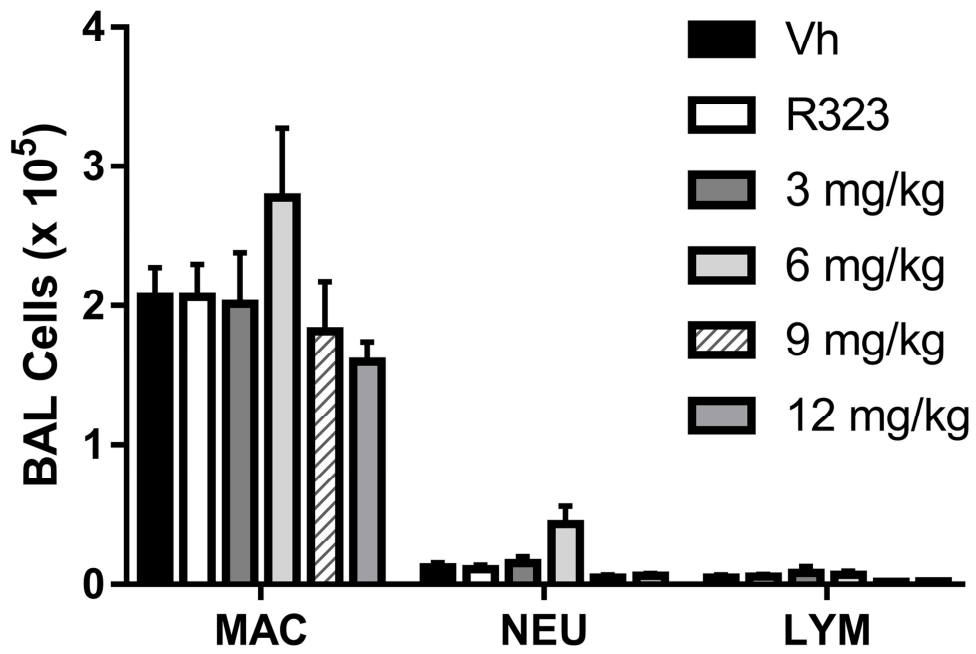

Figure S7

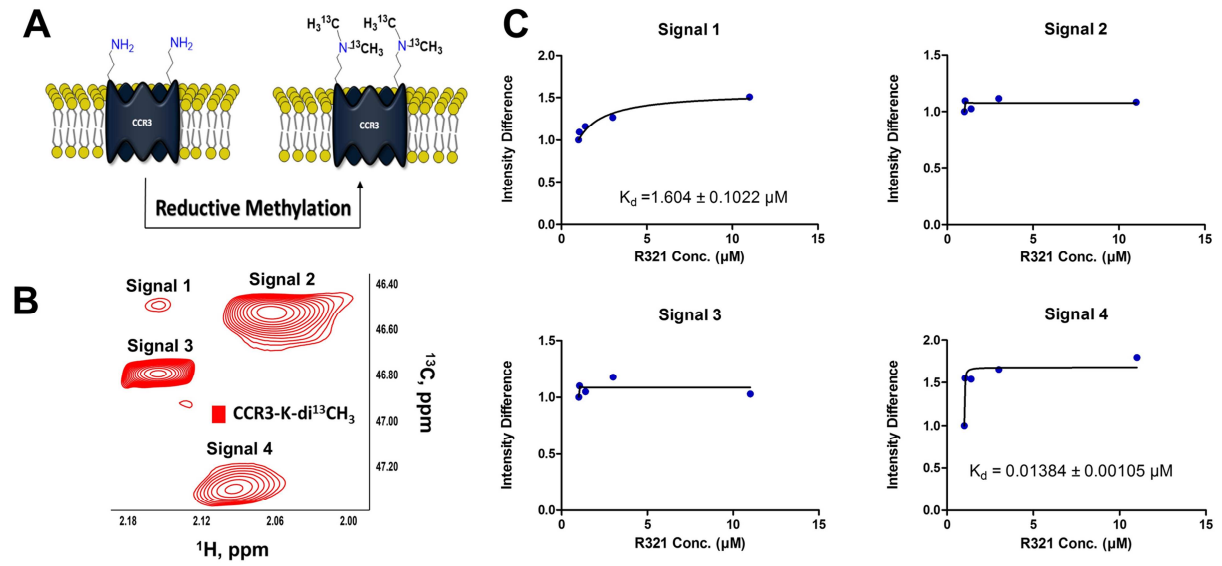

Figure S8

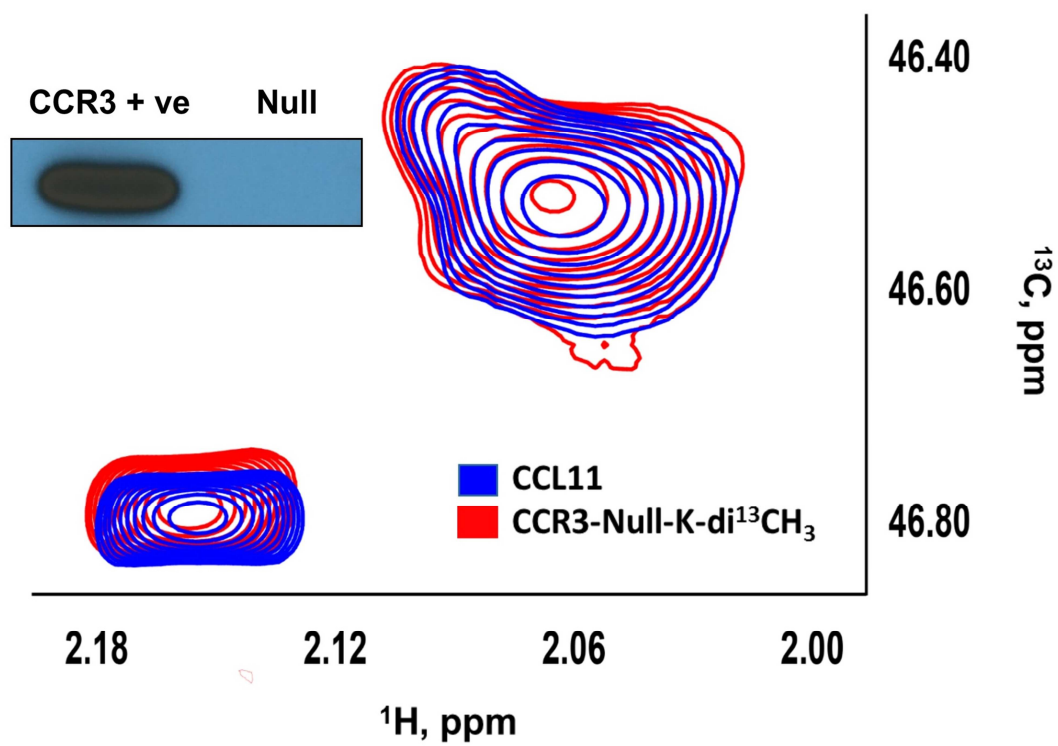

Figure S9

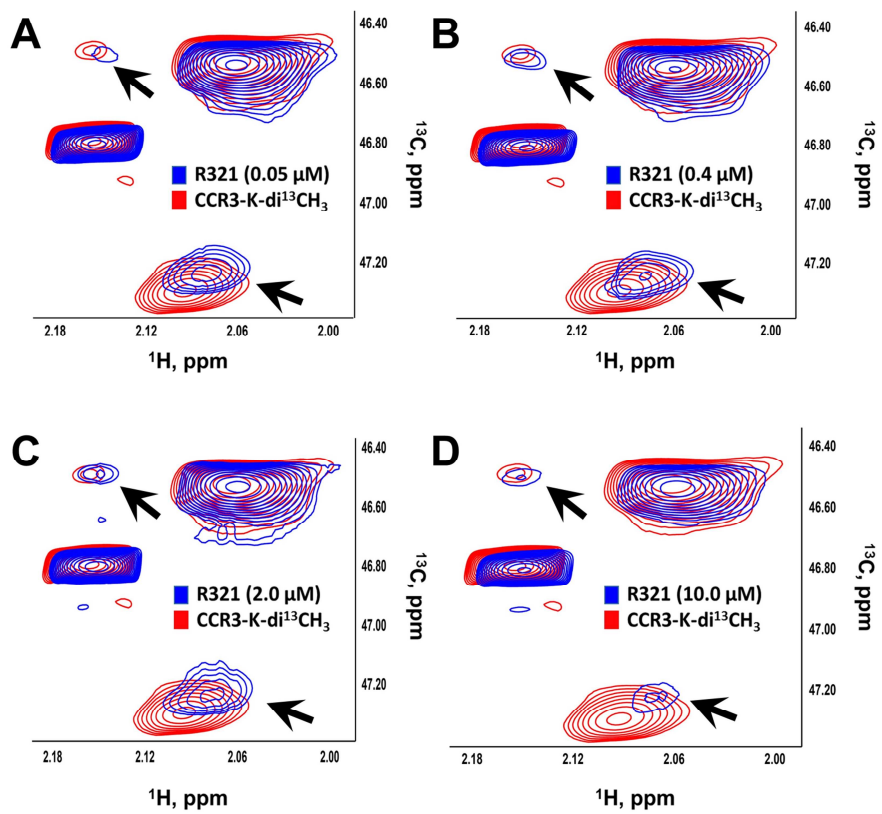

Figure S10

A) Agonist-induced CCR3 signaling pathway

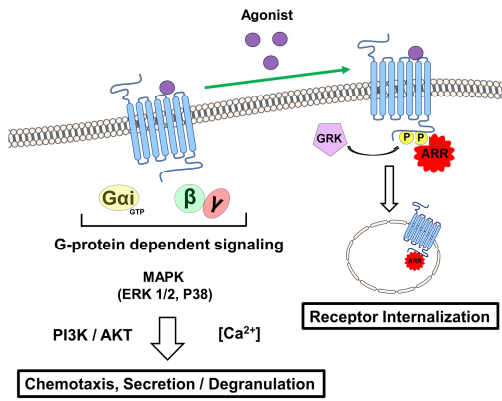

B) R321 acts as a biased antagonist of CCR3

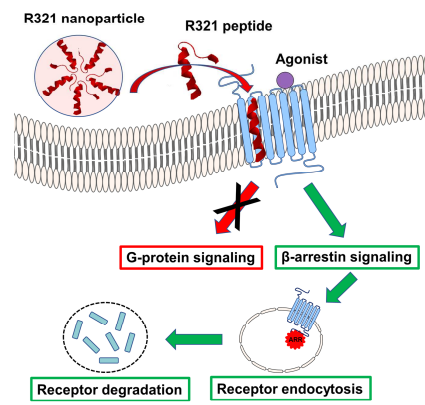

Supplement: NIHMS968799-supplement-supplement_1.pdf [file NIHMS968799-supplement-supplement_1.pdf]
